# Supplementary material for: Fabrication of porous TiO2–SiO2 multifunctional anti-reflection coatings by sol–gel spin coating method
Source: Royal Society of Chemistry journal article supplement (doi:10.1039/c4ra10424b), 2014-01-01
Supplement: c4ra10424b1.pdf [file c4ra10424b1.pdf]

Supporting Information.

**Figure 10.** The curves of a) conversion of  $C_6H_6$  and b) the amount of produced  $CO_2$  of blank test (no glass substrate, only with benzene).

**Figure 11.** Change of the water contact angle on the surface of 20% TiO<sub>2</sub>-SiO<sub>2</sub> coating in the dark after hydrophilic state produced by the Uv irradiation.
